# Supplementary material
Source: HighWire-hosted journal article supplement (https://www.rcpjournals.org/highwire/filestream/8338/field_highwire_adjunct_files/0/Supplementary_file_1_IV_to_oral_switch_criteria_of_the_study_hospital.pdf)
Supplement: Supplementary_file_1_IV_to_oral_switch_criteria_of_the_study_hospital.pdf [file Supplementary_file_1_IV_to_oral_switch_criteria_of_the_study_hospital.pdf]

## Does the patient meet the following IV to oral switch criteria?

1. Clinical condition of the patient is improving and haemodynamically stable;
  - HR <100 beats per minute for at least 12 hours with no unexplained tachycardia,
  - Systolic blood pressure >100mmHg,
  - Respiratory rate <20 breaths per minute and no tachypnoea).
  - Afebrile for at least 24 hours (temperature < 38°C oral).
  - Trend towards normalisation of CRP and peripheral WCC ( $4-12 \times 10^9/L$ ).
2. Able to tolerate oral medication and appropriate oral antimicrobial available.
  - Functioning gastrointestinal tract without risk of malabsorption.
3. No haematological malignancy or neutropenia.
4. No serious deep-seated infection that requires high-dose IV (see below)

Meningitis and CNS infection, osteomyelitis or mediastinitis, endocarditis or intravascular infection, septic arthritis, Legionella pneumonia, abscess or empyema not drained, exacerbations of cystic fibrosis and bronchiectasis, *Staphylococcus aureus* bacteraemia, infection of prosthetic device or foreign body, severe
